# Supplementary material for: Replisome stall events have shaped the distribution of replication origins in the genomes of yeasts
Source: PubMed Central journal article supplement (PMC3834809; doi:10.1093/nar/gkt728), 2013-08-19
Supplement: supp_gkt728_nar-01388-v-2013-File008.pdf [file supp_gkt728_nar-01388-v-2013-File008.pdf]

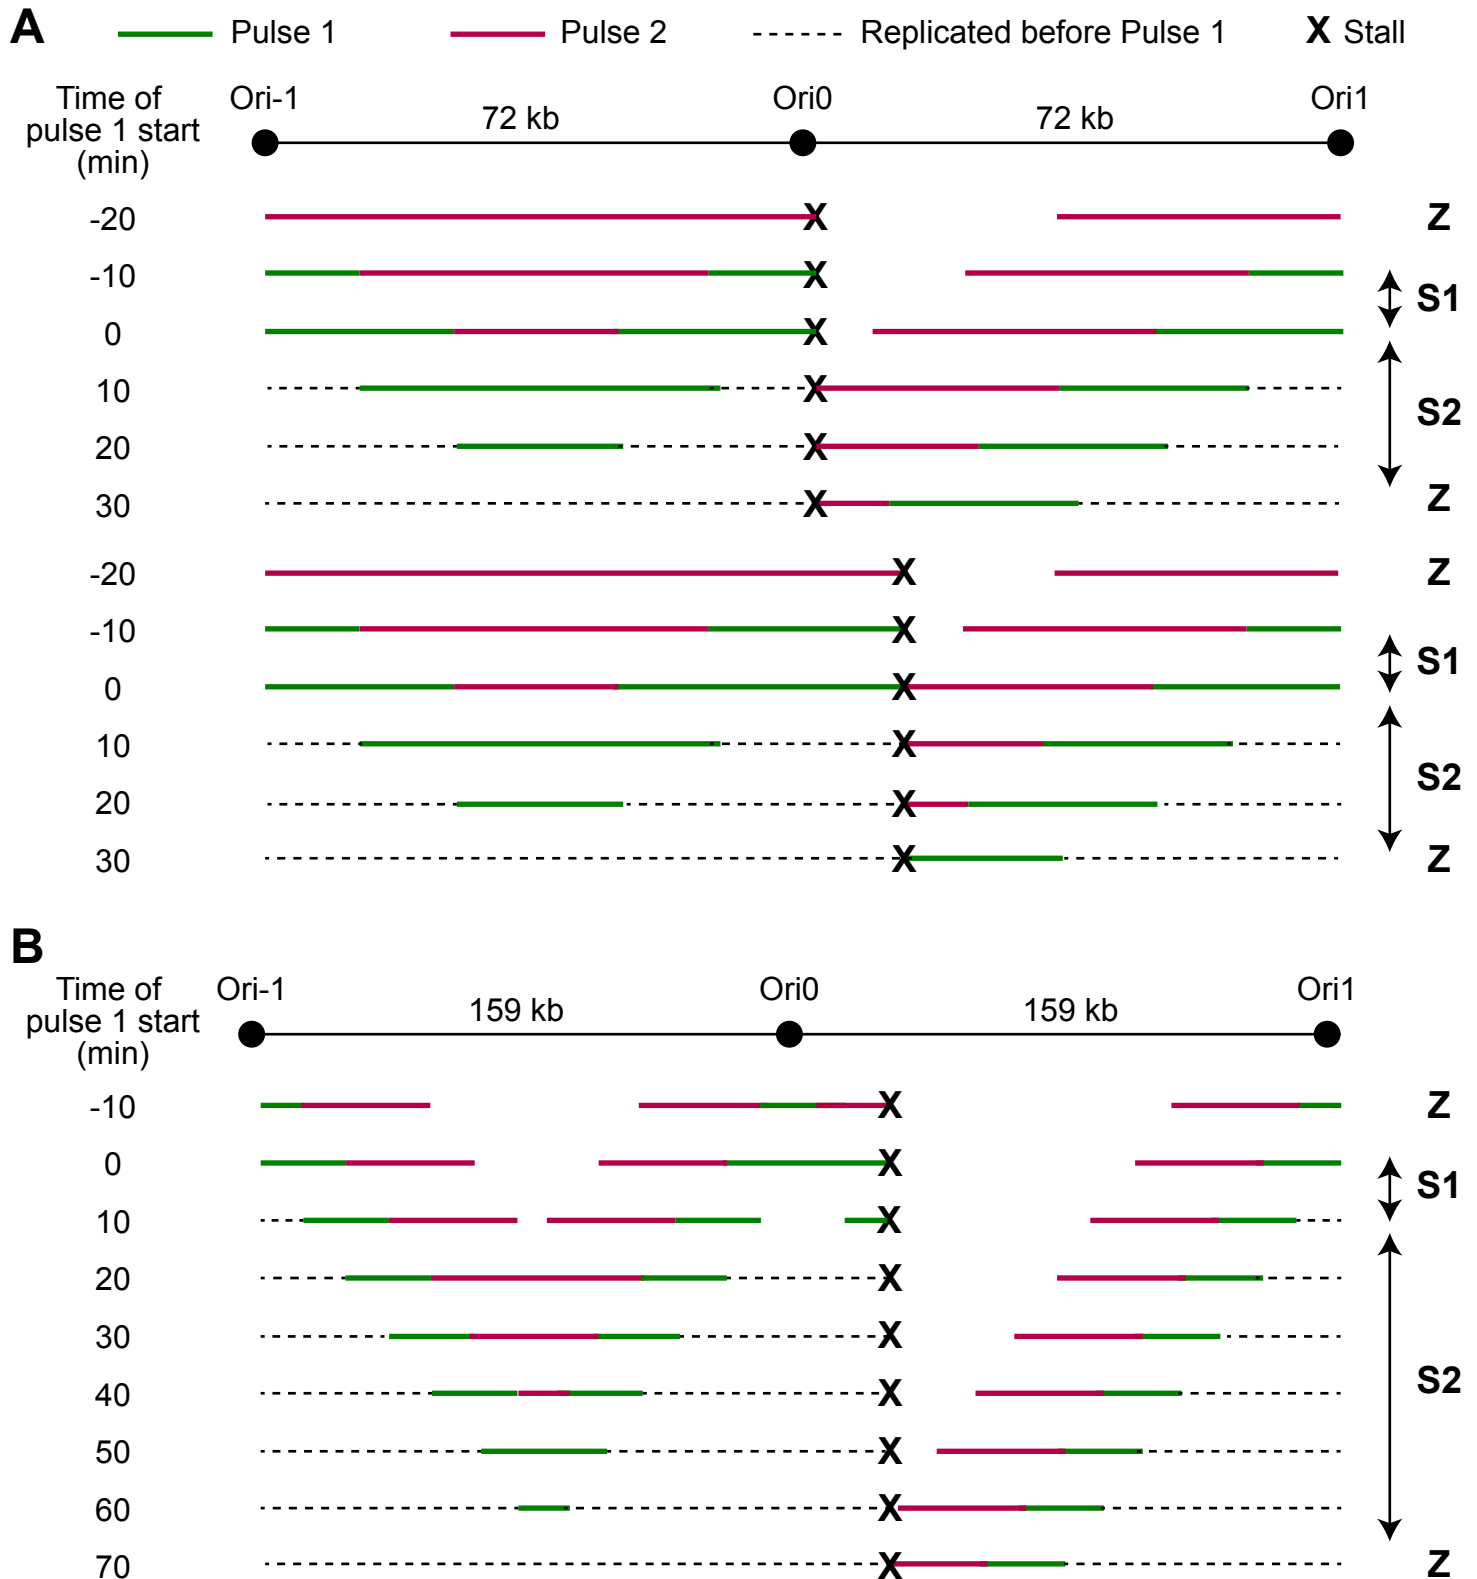

**Supplementary Figure S1.** Idealised representation of double label experiments.

Schematic representation of experiments performed by Maya-Mendoza et al (ref 31). Cells were pulsed for 20 min with BrdU (green) then pulsed for 30 min with biotin-11-dUTP (red), and then DNA fibres were analysed. DNA replicated before the BrdU pulse is shown by a dashed line. 3 synchronously firing origins are shown. The patterns are ordered according to when the origins fired relative to the start of the BrdU pulse. 'Type 4' structures consist of a BrdU track that is adjacent to but not contiguous with a biotin track, and must result from a fork stall. They can be divided into two categories: S1, where the stall occurred during the BrdU pulse, and S2, where the stall occurred before the BrdU pulse. Z denotes patterns that would not typically fall into the 'Type 4' category (note that depending on the behaviour of the origin to the left of Ori-1, the bottom configuration in each time series might show a Type 4 pattern). The fork rate is  $\sim 1.25$  kb/min. **A.** MRC5 data, mean origin-to-origin spacing 72 kb (0.5% Type 4 patterns). **B.** HeLa cell data, mean origin-to-origin spacing 159 kb (1.5% Type 4 patterns). The larger origin-to-origin spacing in HeLa cells means more stalls occur before the pulse and a correspondingly higher number of Type 4 patterns.

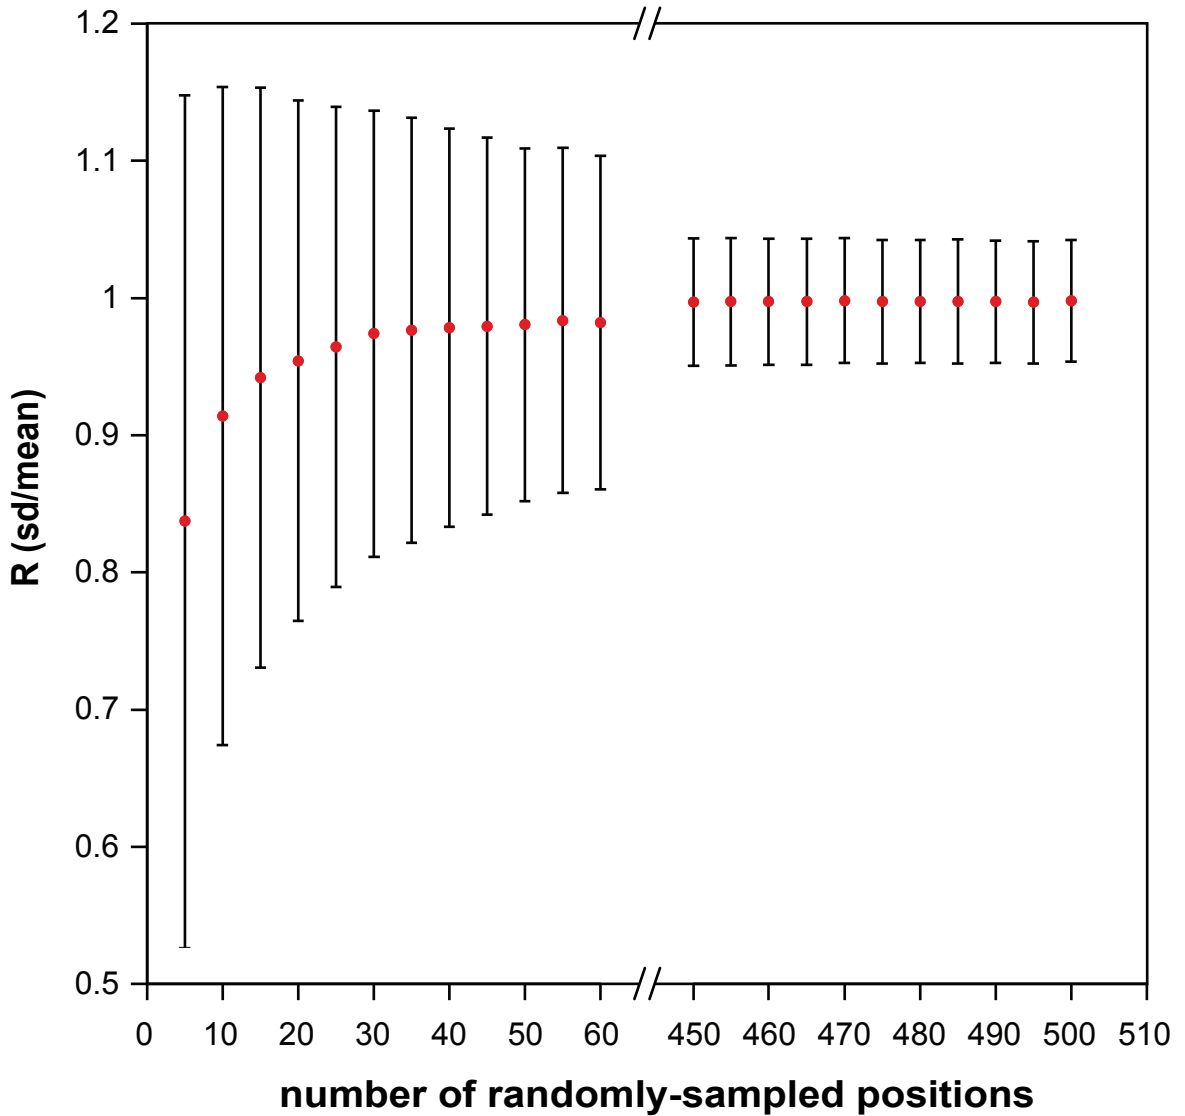

**Supplementary Figure S2.**  $R$  for randomly sampled positions on a finite line. In simulations, the number of positions indicated on the x axis were randomly selected on a finite line, and for each simulation the resulting value for  $R$  (the standard deviation divided by the mean of the separation between the positions) was calculated. Red dots show the mean value of  $R$  in 10,000 iterations, and error bars show the respective standard deviation of the mean values.

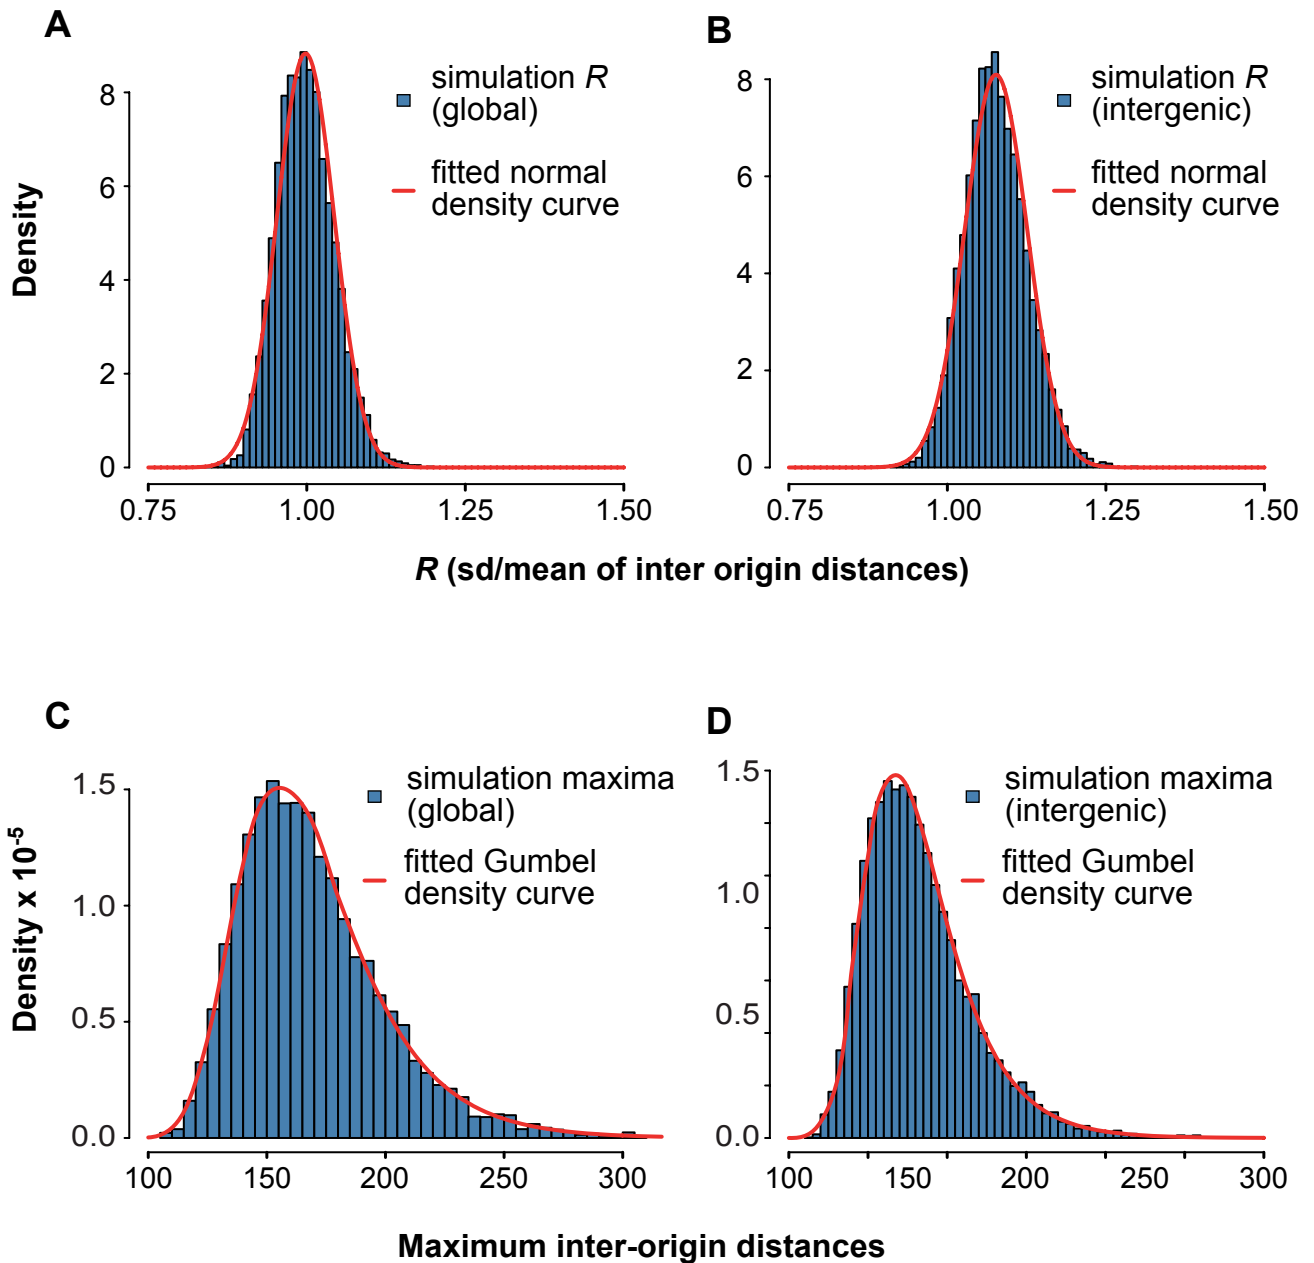

**Supplementary Figure S3.** Fitted distributions used for p value estimation.

Histograms show the probability distribution of randomly-positioned *S. cerevisiae* origins (blue bars) compared with fitted density curves.

**A**,  $R$  values of globally distributed origins, fitted to a normal density curve.

**B**,  $R$  values of origins restricted to intergenic regions, fitted to a normal density curve.

**C**, Maximum inter-origin distances of globally distributed origins, fitted to a Gumbel (extreme value) density curve.

**D**, Maximum inter-origin distances of origins restricted to intergenic regions, fitted to a Gumbel (extreme value) density curve.

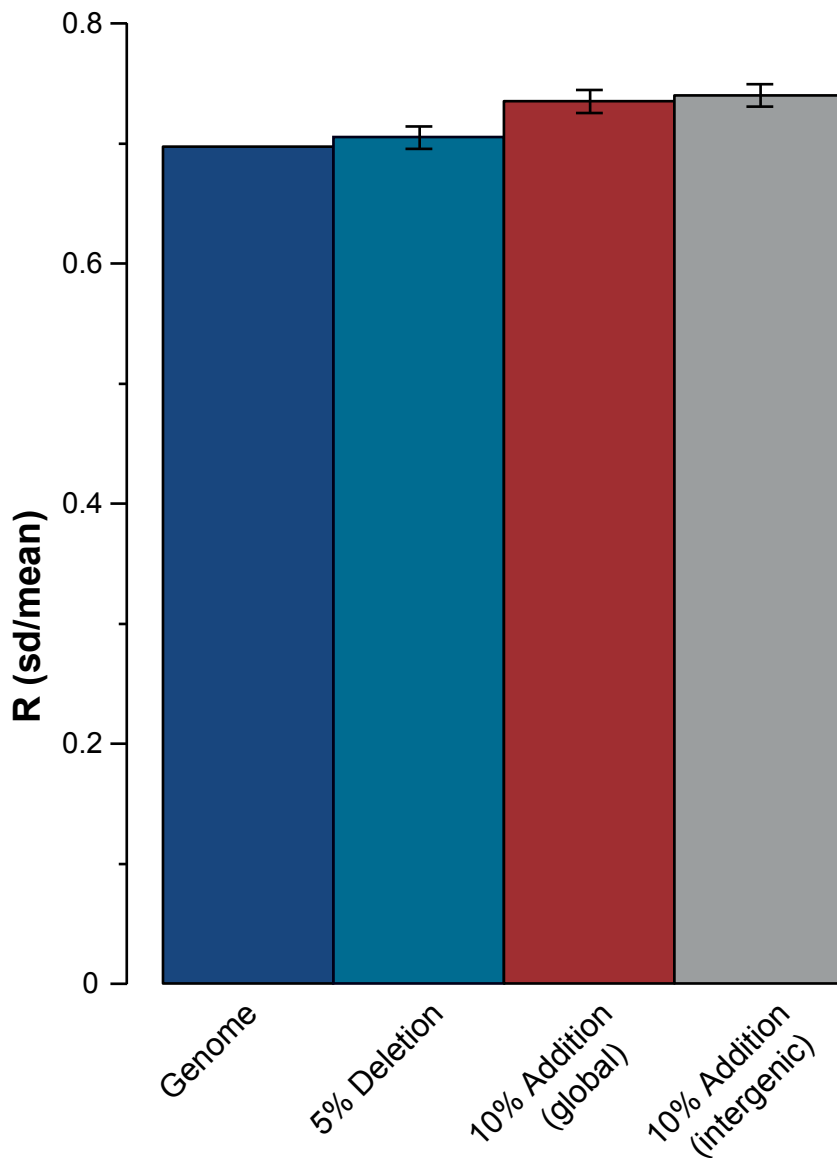

**Supplementary Figure S4.** Robustness of *S. cerevisiae*  $R$  value.

The robustness of the inter-origin distance  $R$  value (standard deviation to mean ratio) was tested by randomly deleting or adding origins in the data set. Data is shown for the deletion of 5% of the origins, or addition of an extra 10% origins either globally throughout the genome or restricted to intergenic regions. For each condition, mean and standard deviation of 10,000 simulations is shown.

**A**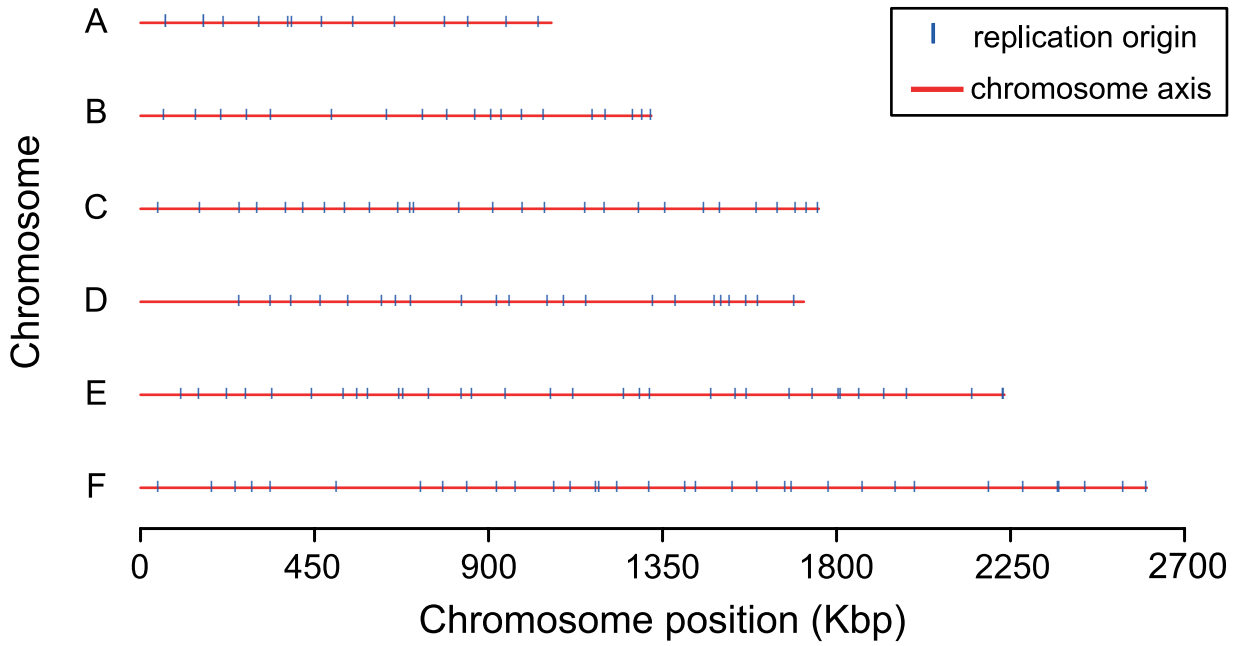**B**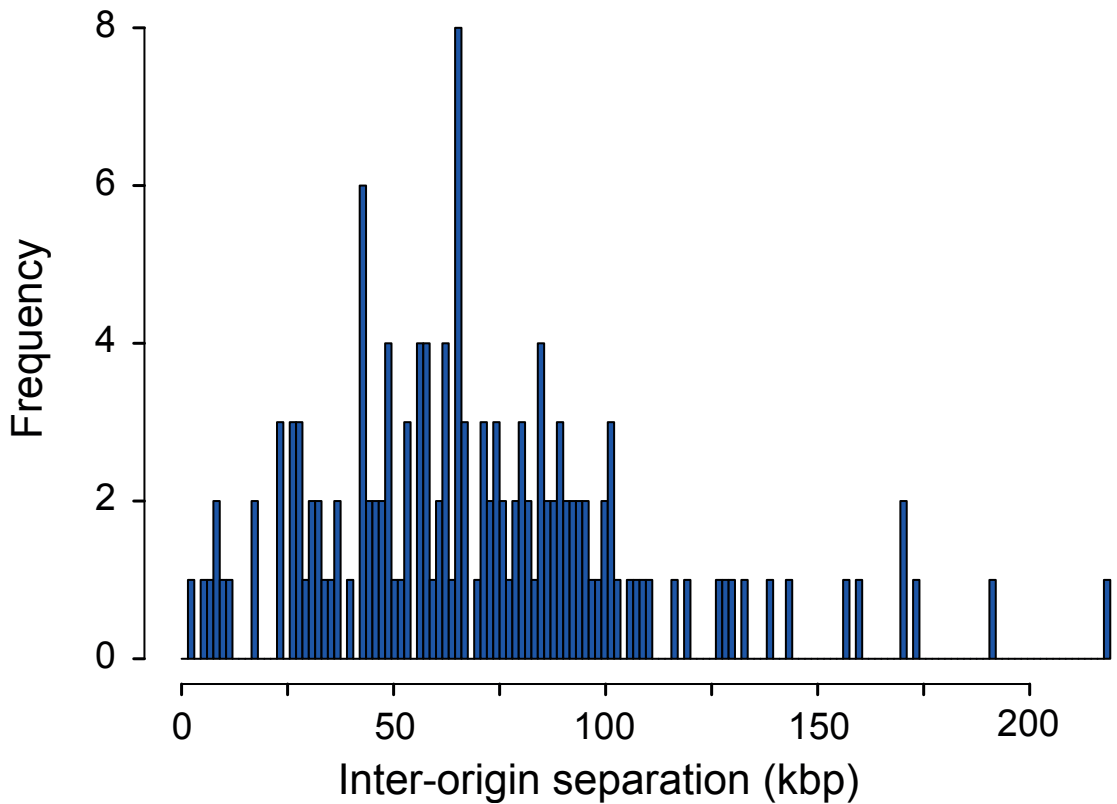

**C**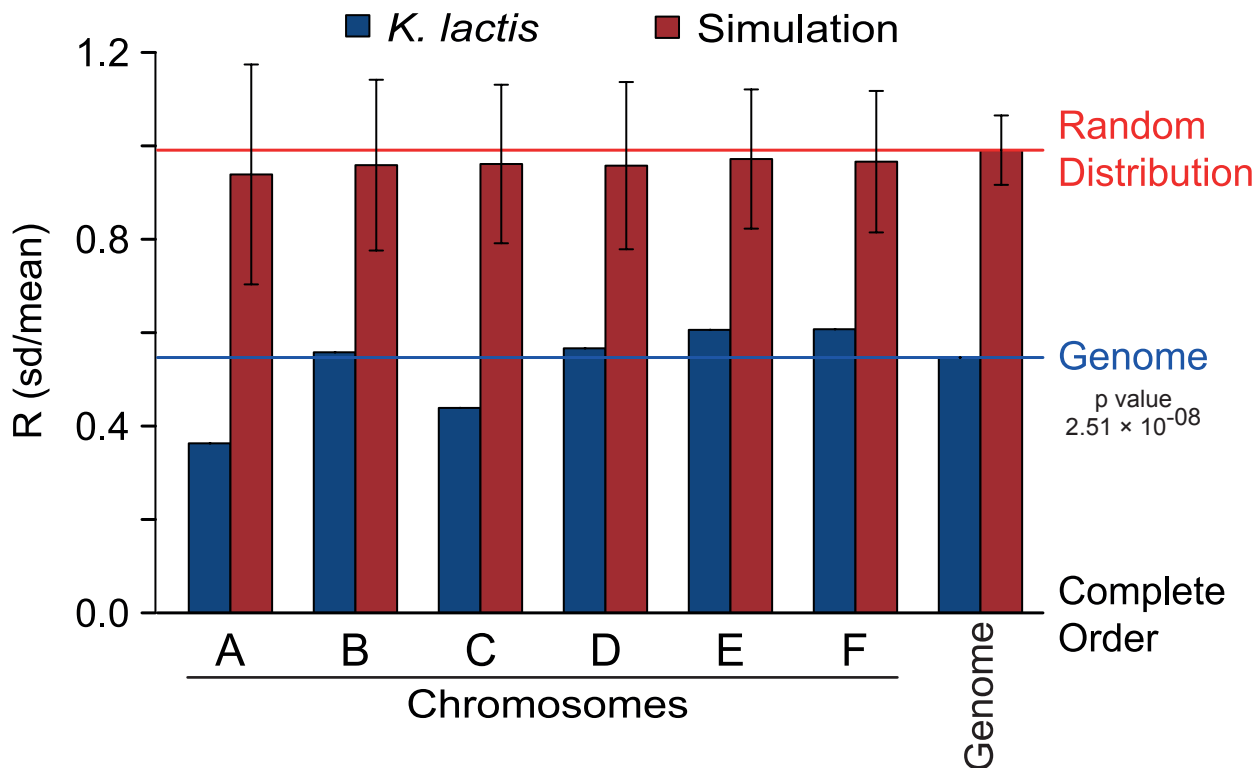**D**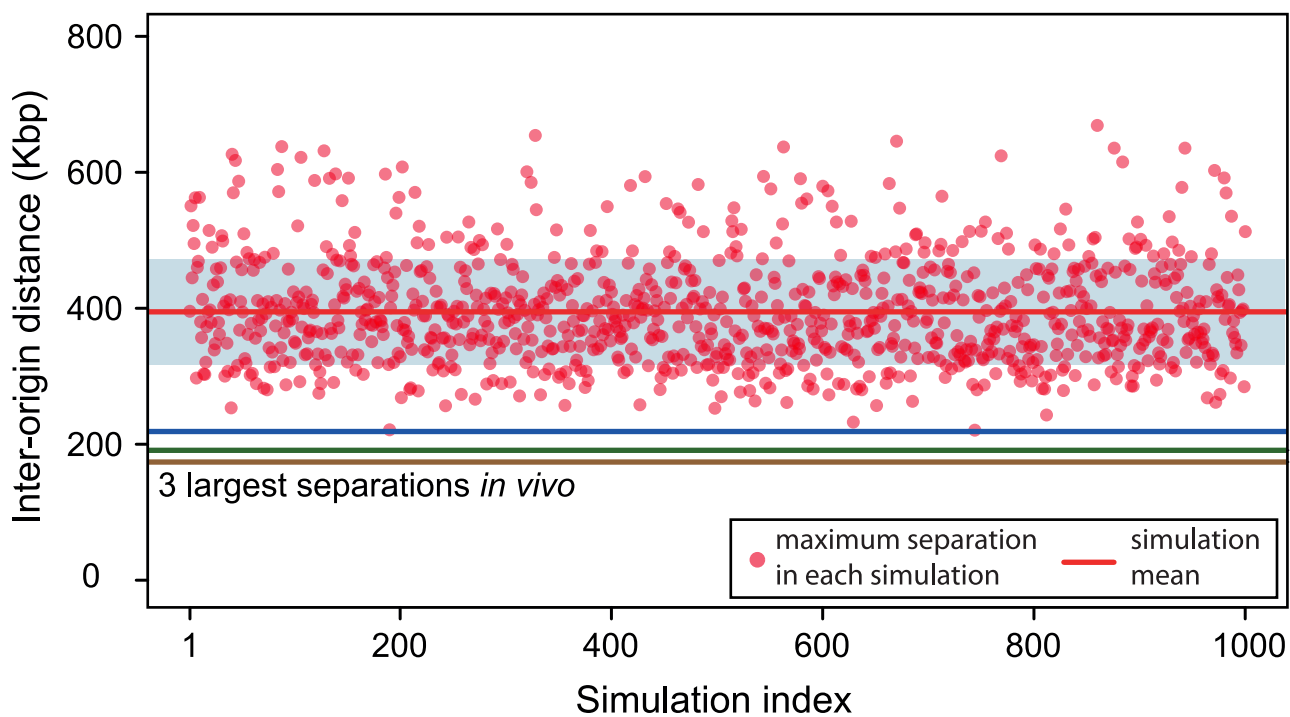

**Supplementary Figure S5.** Origin distribution in *Kluyveromyces lactis*.

**A.** Positions of 148 replication origins in all 6 *K. lactis* chromosomes.

**B.** Frequency histogram of inter replication origin separations (bin size 1.5 kb). The mean of the genome-wide inter-origin separation is 70.8 kbp.

**C.**  $R$  (standard deviation/mean of inter origin separations) in the genome (blue bars). Mean and standard deviation for  $R$  from 10,000 iterations of random sampling of positions equal to the number of replication origins in each chromosome (red bars).  $p$  value was estimated using a fitted normal distribution.

**D.** The three largest inter-origin distances in the genome (219, 191 and 174 kbp) are shown as horizontal lines (blue, green, and brown). A computer simulation was performed for an equal number of randomly positioned origins. Red dots are the maximum origin separation in each simulation (1000 shown). The mean of these simulated values is 399 kbp (red line) with a standard deviation of 85 (shaded box around the red line). The mean and standard deviation is calculated from 10,000 iterations in the simulation. The genomic maximum inter-origin distance (219 kb) had a  $p$  value of  $2.37 \times 10^{-4}$  against the simulation (from a fitted Gumbel distribution).

**A**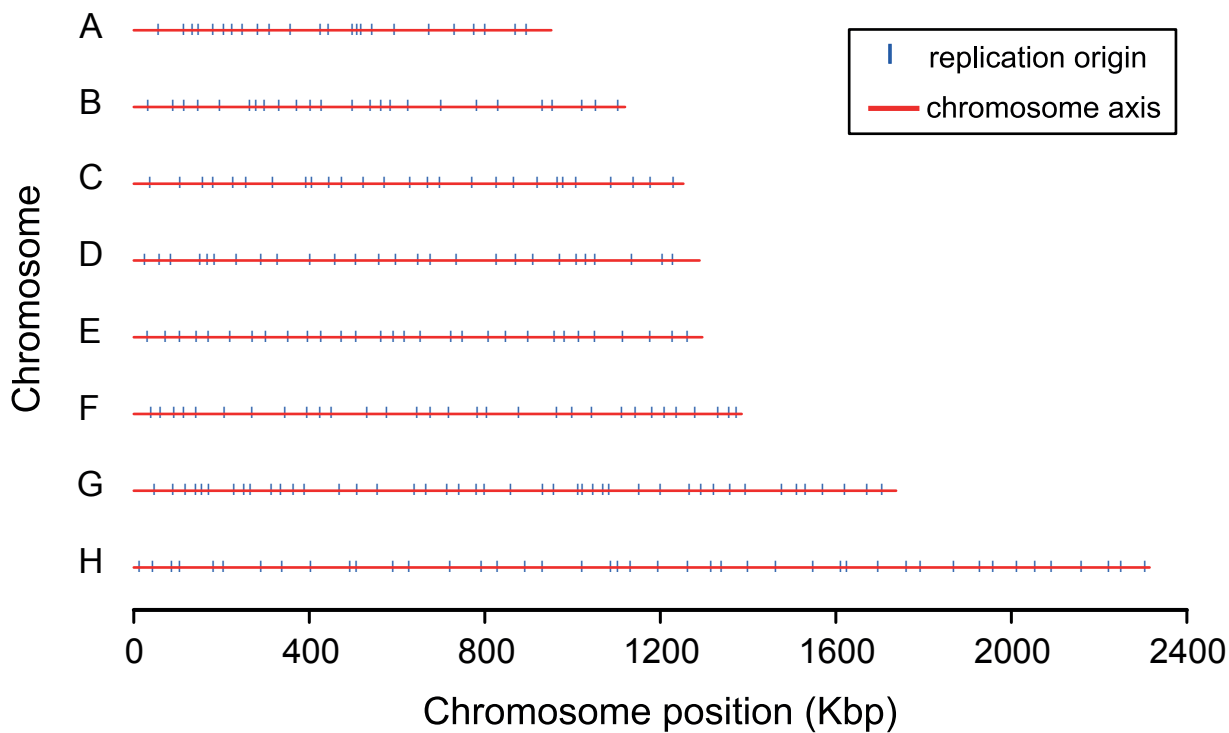**B**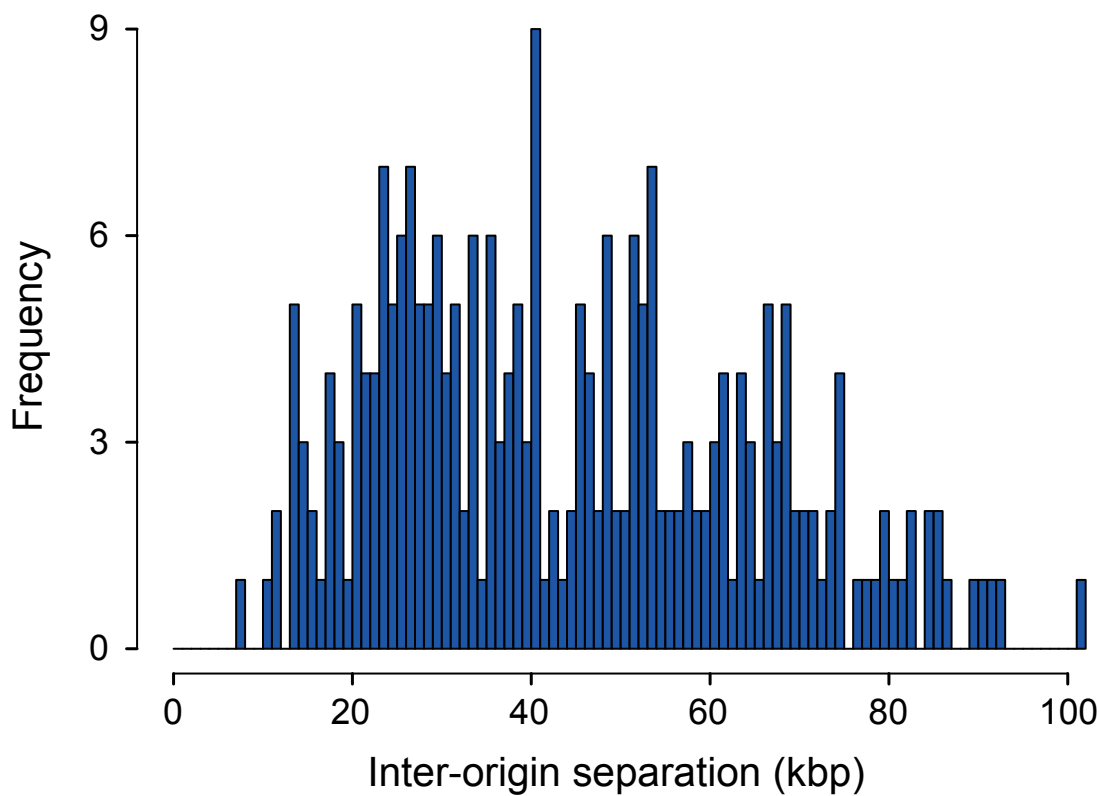



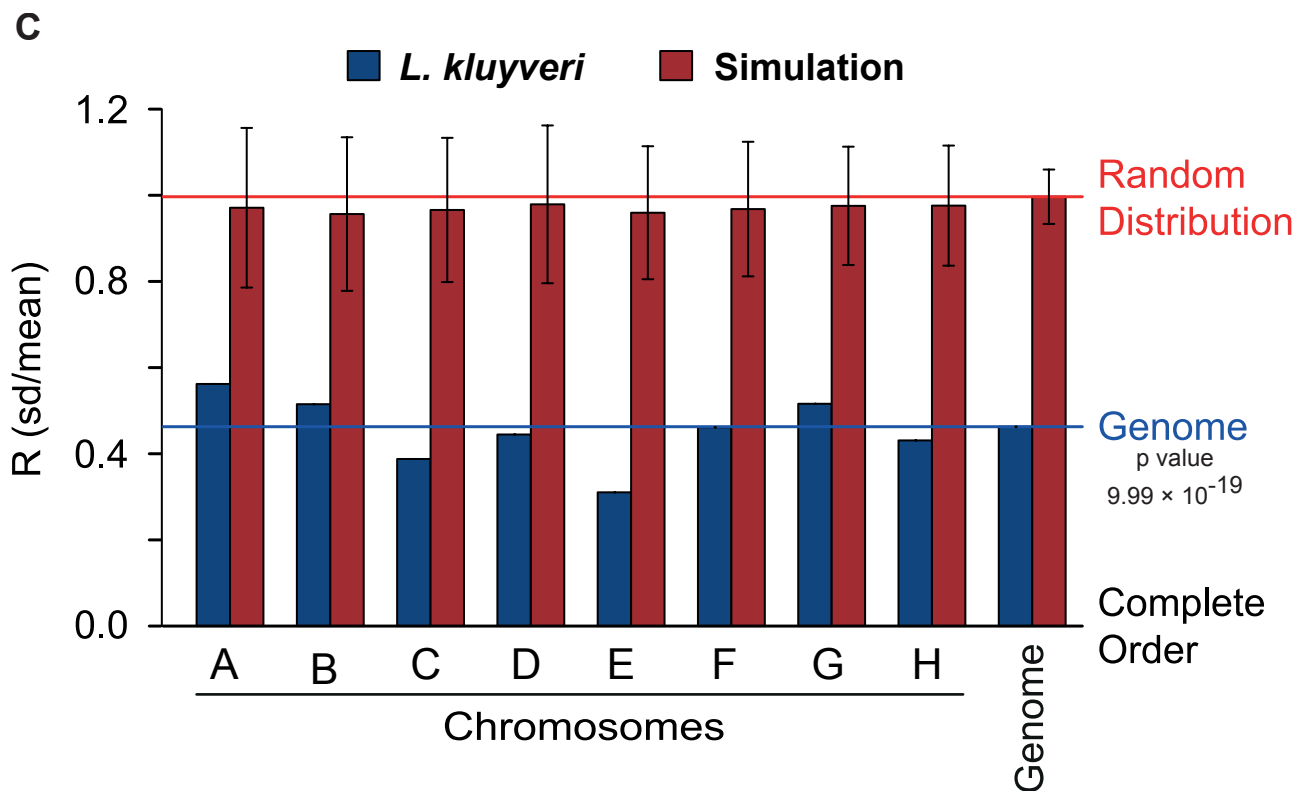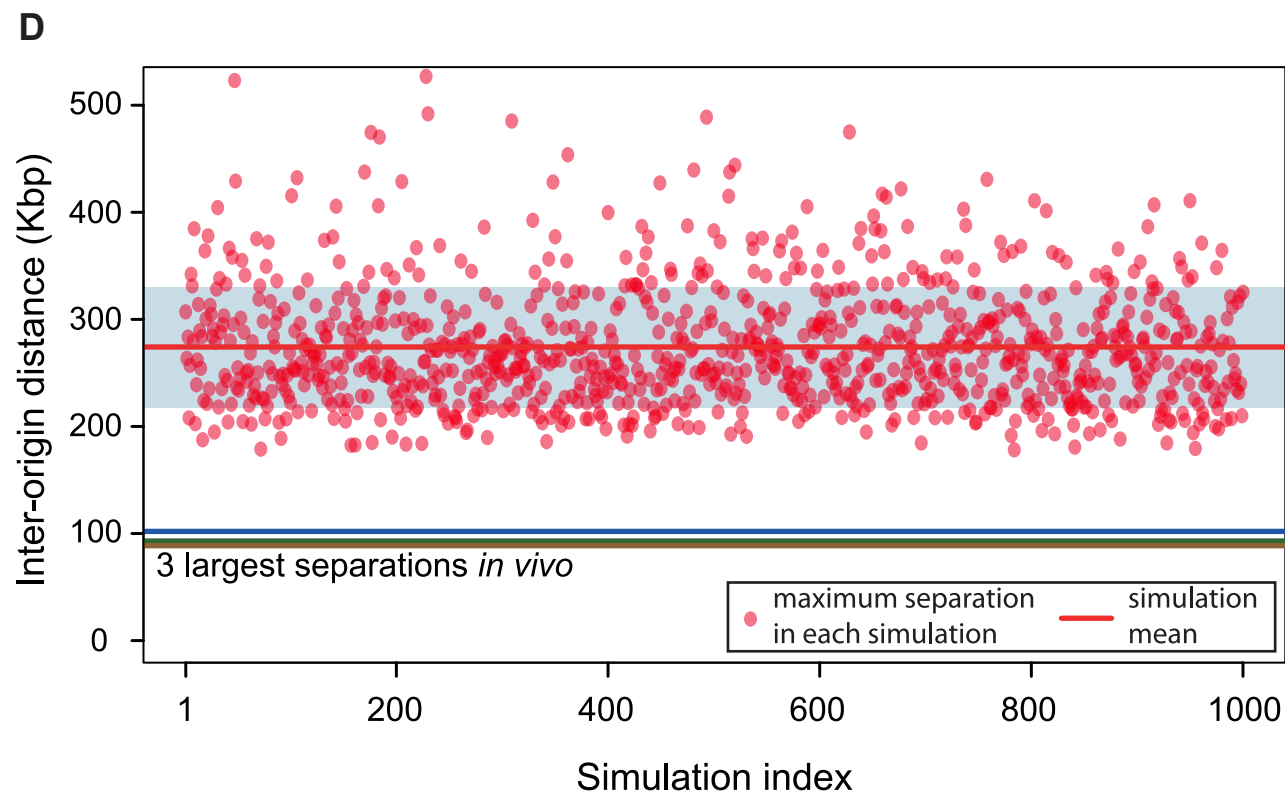

**Supplementary Figure S6.** Origin distribution in *Lachancea kluyveri*.

**A.** Positions of 252 replication origins in all 8 *L. kluyveri* chromosomes.

**B.** Frequency histogram of inter replication origin separations (bin size 1 kb). The mean of genome-wide inter origin separation is 44.34 kbp.

**C.**  $R$  (standard deviation/mean of inter origin separations) in the genome (blue bars). Mean and standard deviation for  $R$  from 10,000 iterations of random sampling of positions equal to the number of replication origins in each chromosome (red bars).  $p$  value was estimated from a fitted normal distribution.

**D.** The three largest inter-origin distances in the genome (102, 93 and 92 kbp) are shown as horizontal lines (blue, green, and brown). A computer simulation was performed for an equal number of randomly positioned origins. Red dots are the maximum origin separation in the random simulation (1000 shown). The mean of these simulated values is 273 kbp (red line) with a standard deviation of 53 (shaded box around the red line). The mean and standard deviation is calculated from 10,000 iterations in the simulation. The genomic maximum inter-origin distance (102 kb) had a  $p$  value of  $8.78 \times 10^{-16}$  against the simulation (from a fitted Gumbel distribution).

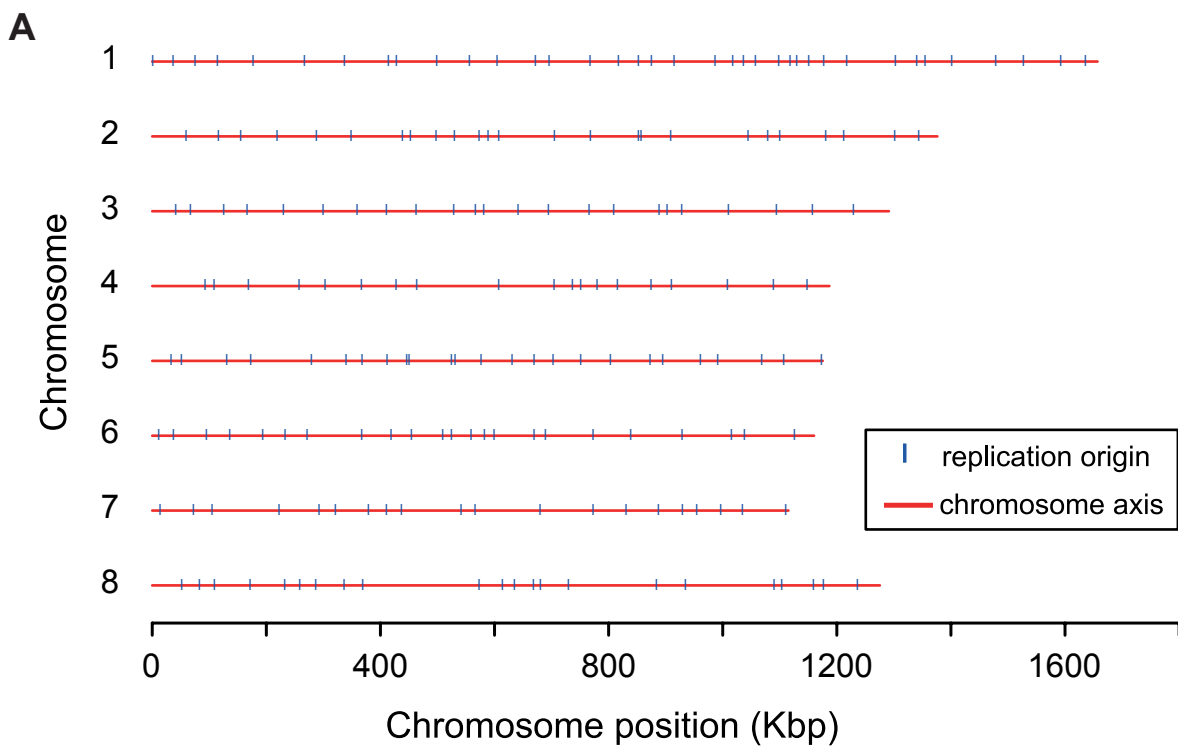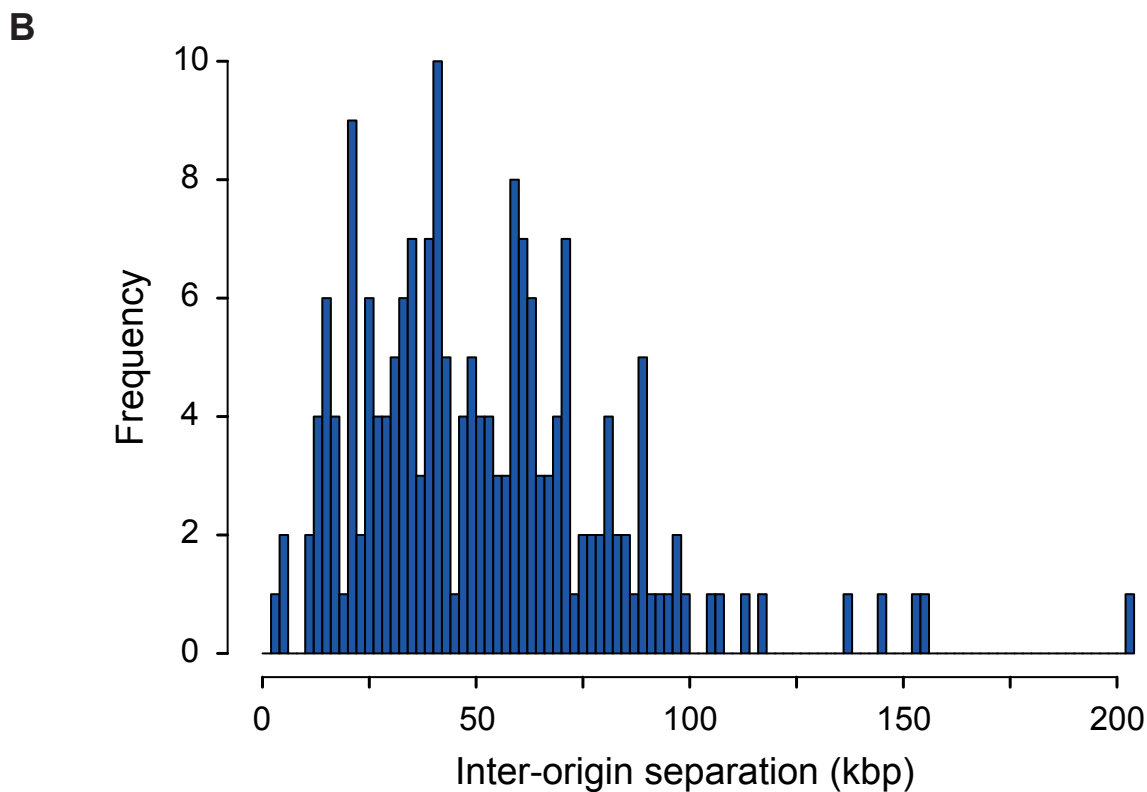

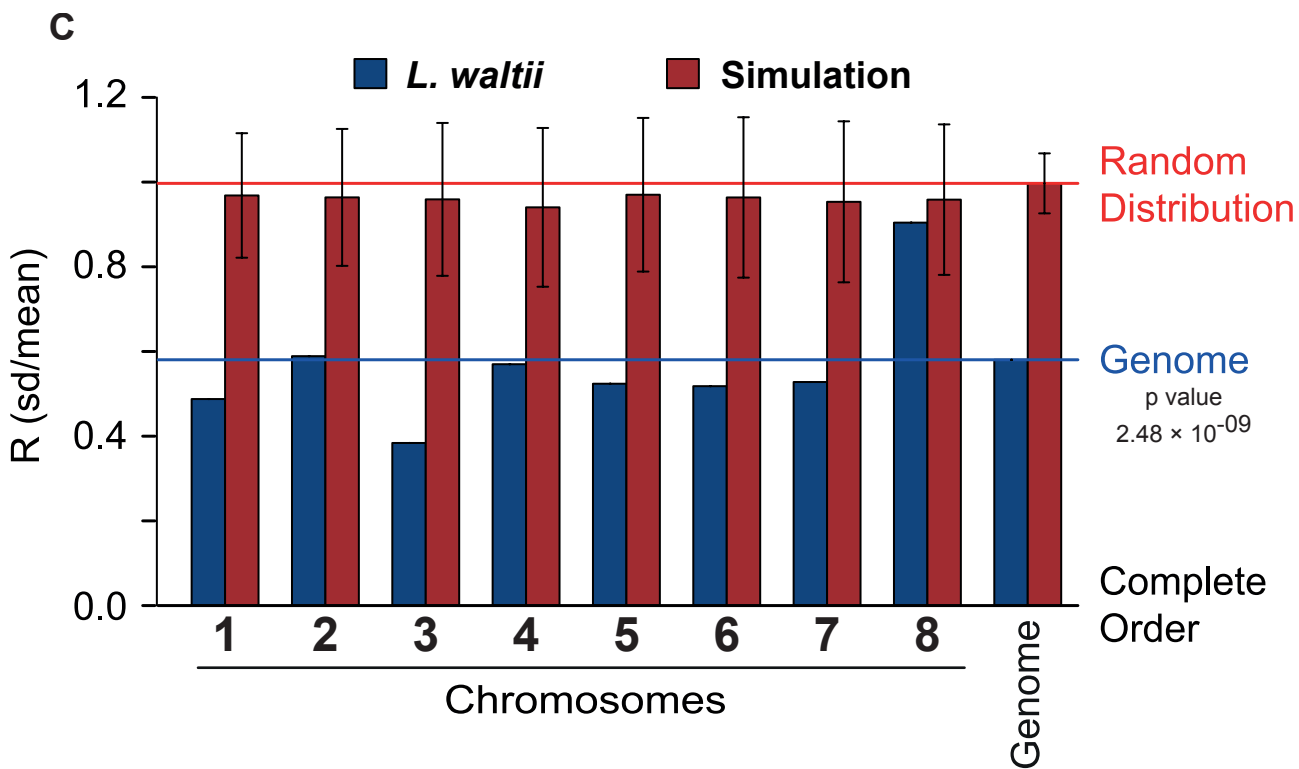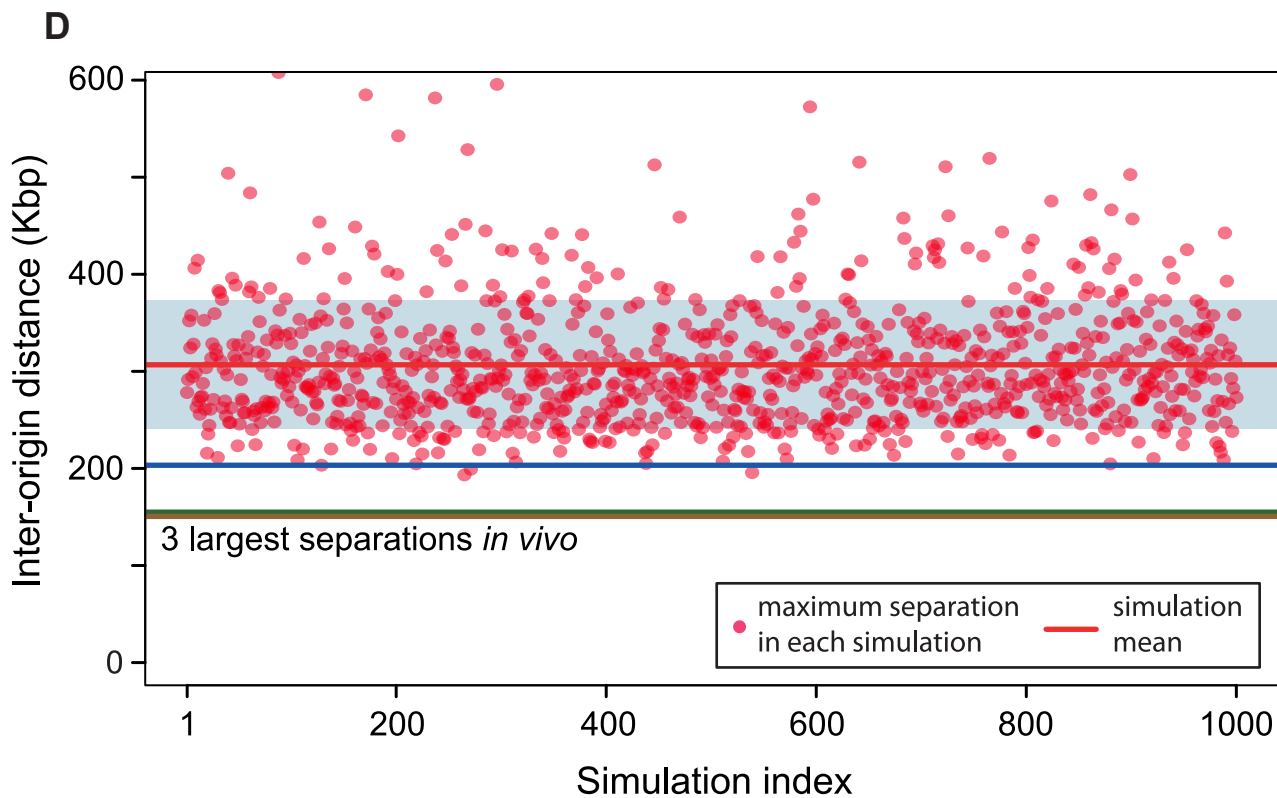

**Supplementary Figure S7.** Origin distribution in *Lachancea waltii*.

**A.** Positions of 194 replication origins in all 8 *L. waltii* chromosomes.

**B.** Frequency histogram of inter replication origin separations (bin size 2 kb). The mean of genome-wide inter origin separation is 52.13 kbp.

**C.** R (standard deviation/mean of inter origin separations) in the genome (blue bars). Mean and standard deviation for R from 10,000 iterations of random sampling of positions equal to the number of replication origins in each chromosome (red bars). p value was estimated from a fitted normal distribution.

**D.** The three largest inter-origin distances in the genome (203, 155 and 153 kbp) are shown as horizontal lines (blue, green, and brown). A computer simulation was performed for an equal number of randomly positioned origins. Red dots are the maximum origin separation in the random simulation (1,000 shown). The mean of these simulated values is 307 kbp (red line) with a standard deviation of 64 (shaded box around the red line). The mean and standard deviation is calculated from 10,000 iterations in the simulation. The genomic maximum inter-origin distance (203 kb) had a p value of  $1.08 \times 10^{-2}$  against the simulation (from a fitted Gumbel distribution).

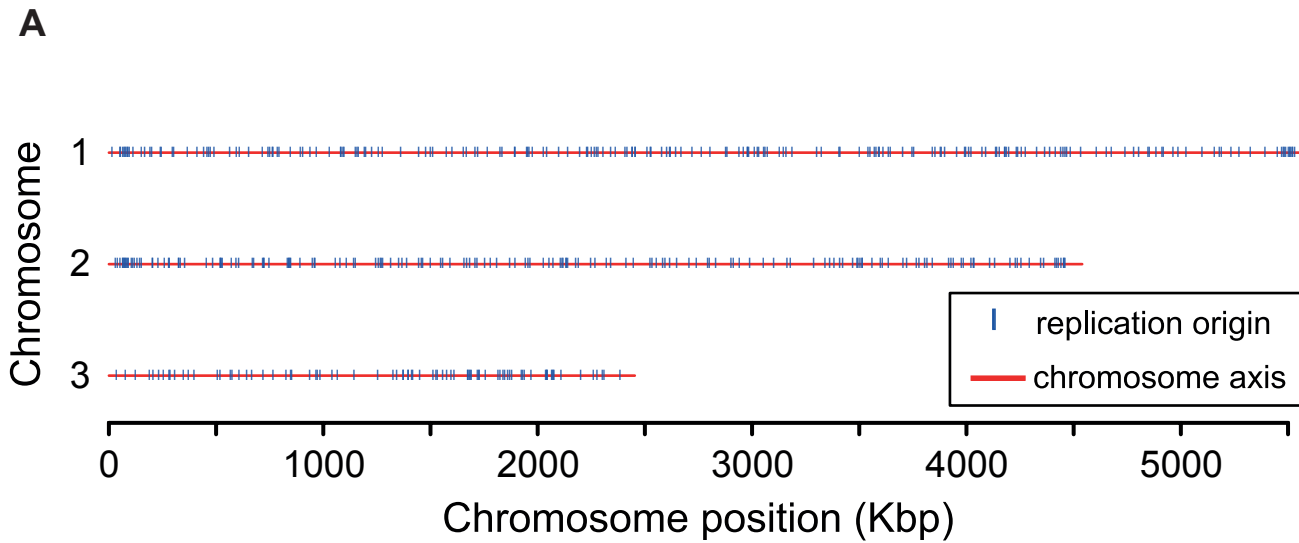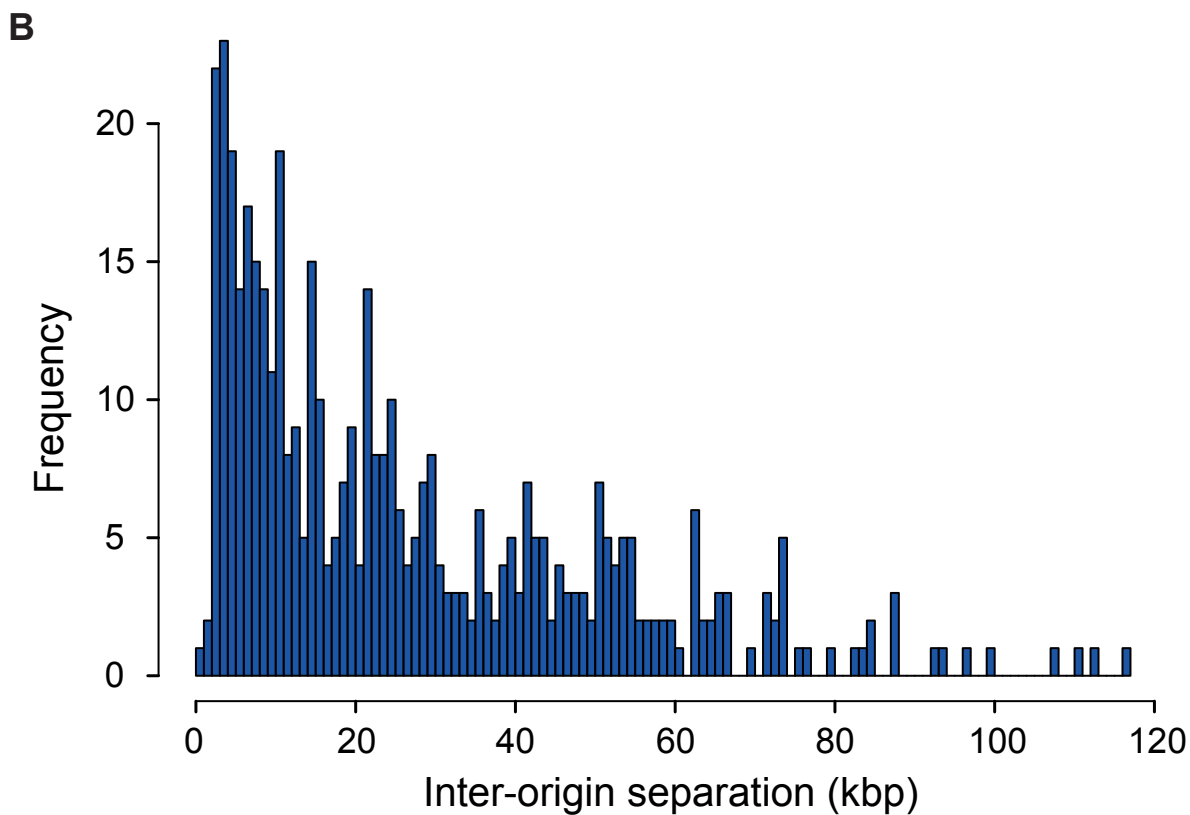

**C**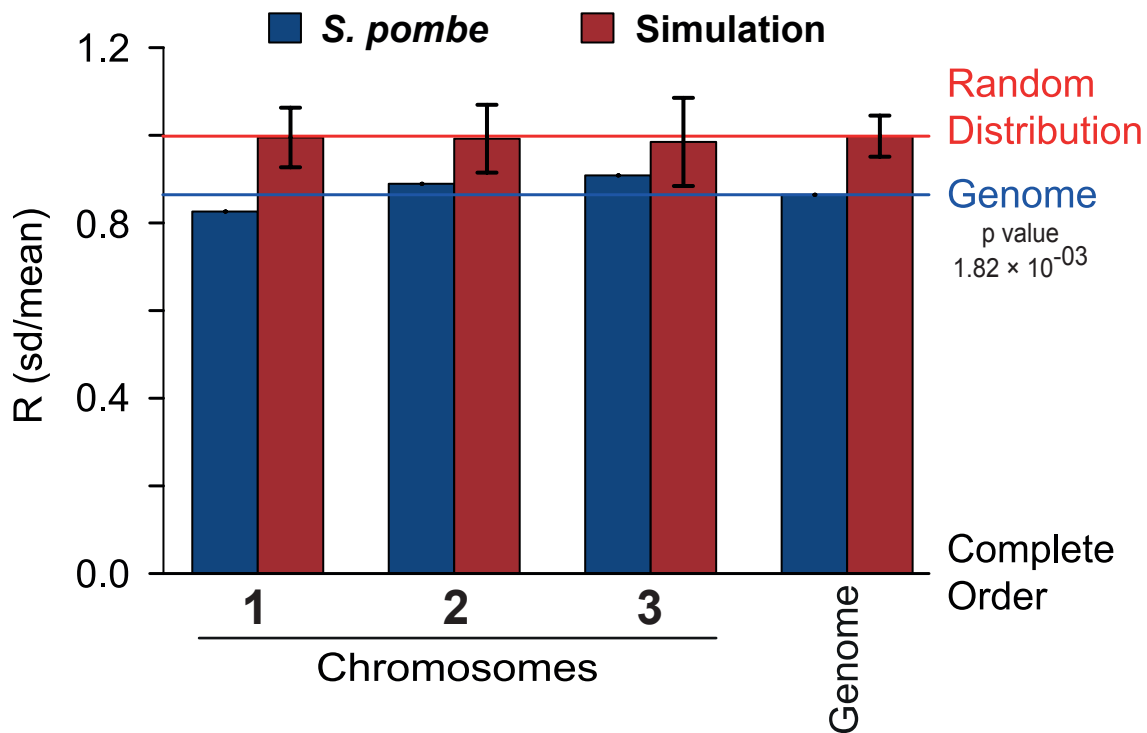**D**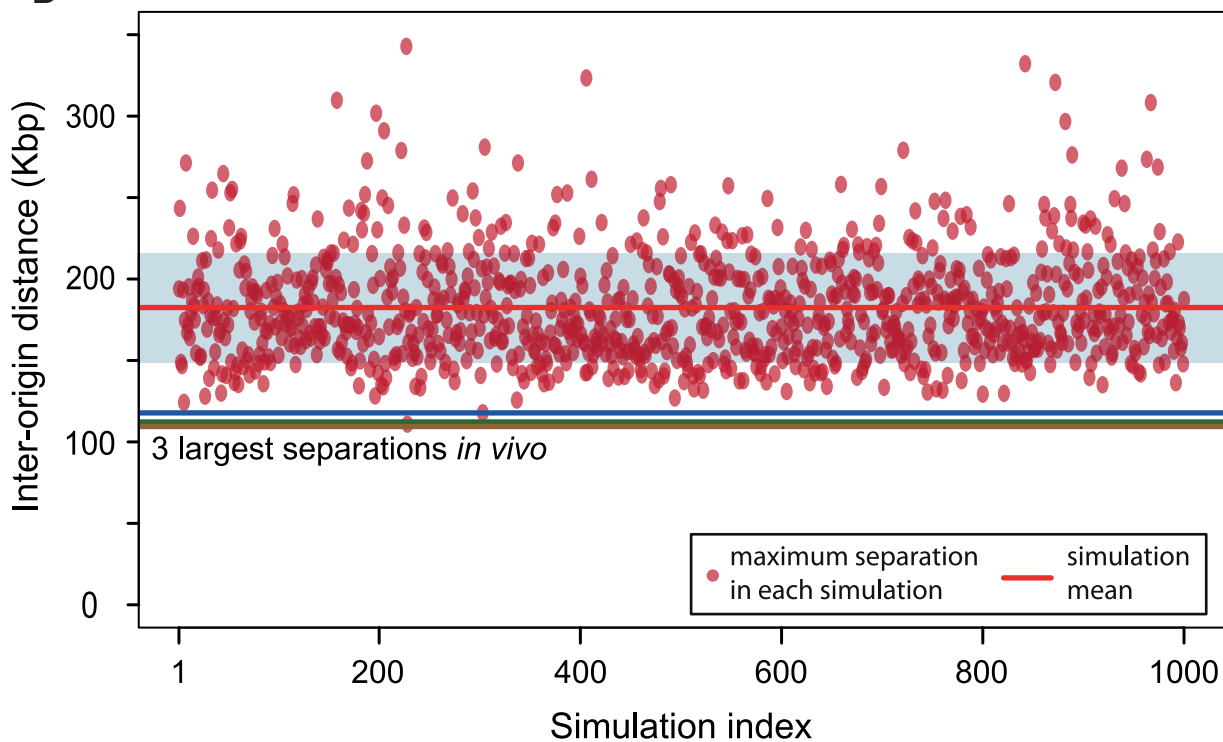

**Supplementary Figure S8.** Origin distribution in *Schizosaccharomyces pombe*.

**A.** Positions of 460 replication origins in all 3 *S. pombe* chromosomes.

**B.** Frequency histogram of inter replication origin separations (bin size 1 kb). The mean of genome-wide inter origin separation is 26.9 kb.

**C.**  $R$  (standard deviation/mean of inter origin separations) in the genome (blue bars). Mean and standard deviation for  $R$  from 10,000 iterations of random sampling of positions equal to the number of replication origins in each chromosome (red bars).  $p$  value was estimated from a fitted normal distribution.

**D.** The three largest inter-origin distances in the genome (116, 112 and 111 kb) are shown as horizontal lines (blue, green, and brown). A computer simulation was performed for an equal number of randomly positioned origins. Red dots are the maximum origin separation in the random simulation (1,000 shown). The mean of these simulated values is 183 kbp (red line) with a standard deviation of 34 (shaded box around the red line). The mean and standard deviation was calculated from 10,000 iterations in the simulation. The genomic maximum inter-origin distance (116 kb) had a  $p$  value of  $9.52 \times 10^{-4}$  against the simulation (from a fitted Gumbel distribution).



**Supplementary Dataset 1: *Saccharomyces cerevisiae* ARS list**

| Chromosome | Start position | End position | ARS name |
|------------|----------------|--------------|----------|
| chr1       | 650            | 1791         | ARS102   |
| chr1       | 6136           | 7136         | ARS102.5 |
| chr1       | 7998           | 8548         | ARS103   |
| chr1       | 30946          | 31184        | ARS104   |
| chr1       | 40716          | 43300        | ARS105   |
| chr1       | 70258          | 70491        | ARS106   |
| chr1       | 124350         | 124599       | ARS107   |
| chr1       | 136900         | 137900       | ARS107.5 |
| chr1       | 146703         | 147690       | ARS108   |
| chr1       | 159906         | 160127       | ARS109   |
| chr1       | 176154         | 176402       | ARS110   |
| chr1       | 214879         | 215635       | ARS111   |
| chr1       | 222871         | 224037       | ARS112   |
| chr1       | 226100         | 227000       | ARS113   |
| chr2       | 39             | 686          | ARS200   |
| chr2       | 6123           | 7127         | ARS201   |
| chr2       | 28933          | 29152        | ARS201.5 |
| chr2       | 38623          | 39068        | ARS201.7 |
| chr2       | 63186          | 63421        | ARS202   |
| chr2       | 93410          | 93811        | ARS203   |
| chr2       | 142868         | 144016       | ARS206   |
| chr2       | 170049         | 170298       | ARS207   |
| chr2       | 177529         | 177877       | ARS207.1 |
| chr2       | 198193         | 198434       | ARS207.5 |
| chr2       | 209187         | 210063       | ARS207.8 |
| chr2       | 237644         | 237879       | ARS208   |
| chr2       | 254890         | 255136       | ARS209   |
| chr2       | 283015         | 283913       | ARS210.5 |
| chr2       | 326099         | 326335       | ARS211   |
| chr2       | 378434         | 379194       | ARS212   |
| chr2       | 389245         | 390368       | ARS213   |
| chr2       | 407831         | 408064       | ARS214   |
| chr2       | 417739         | 418035       | ARS215   |
| chr2       | 440859         | 441697       | ARS215.5 |
| chr2       | 486661         | 486909       | ARS216   |
| chr2       | 516805         | 517805       | ARS217   |
| chr2       | 539137         | 539699       | ARS218   |
| chr2       | 591424         | 591713       | ARS219   |
| chr2       | 611269         | 613200       | ARS219.5 |
| chr2       | 622625         | 622894       | ARS220   |
| chr2       | 631934         | 632246       | ARS221   |
| chr2       | 675947         | 676667       | ARS221.5 |
| chr2       | 704250         | 704521       | ARS222   |
| chr2       | 707158         | 708262       | ARS222.5 |
| chr2       | 720601         | 721038       | ARS223   |
| chr2       | 741512         | 741802       | ARS224   |
| chr2       | 757390         | 757621       | ARS225   |
| chr2       | 773918         | 774348       | ARS227   |

|      |        |        |          |
|------|--------|--------|----------|
| chr2 | 792116 | 792340 | ARS228   |
| chr2 | 796259 | 797162 | ARS228.5 |
| chr2 | 801930 | 802617 | ARS229   |
| chr3 | 837    | 1551   | ARS300   |
| chr3 | 11145  | 11401  | ARS301   |
| chr3 | 11303  | 14854  | ARS302   |
| chr3 | 14574  | 14849  | ARS302   |
| chr3 | 14870  | 15213  | ARS303   |
| chr3 | 15213  | 16274  | ARS320   |
| chr3 | 30199  | 30657  | ARS304   |
| chr3 | 39158  | 39706  | ARS305   |
| chr3 | 74457  | 74677  | ARS306   |
| chr3 | 108775 | 109291 | ARS307   |
| chr3 | 114314 | 114933 | ARS308   |
| chr3 | 131978 | 132322 | ARS309   |
| chr3 | 166494 | 167340 | ARS310   |
| chr3 | 194256 | 194505 | ARS313   |
| chr3 | 197369 | 197601 | ARS314   |
| chr3 | 203876 | 207534 | ARS314.5 |
| chr3 | 224807 | 225053 | ARS315   |
| chr3 | 272844 | 273088 | ARS316   |
| chr3 | 292524 | 292826 | ARS317   |
| chr3 | 294396 | 295027 | ARS318   |
| chr3 | 315346 | 316232 | ARS319   |
| chr4 | 137    | 1392   | ARS400   |
| chr4 | 15492  | 15739  | ARS403   |
| chr4 | 21265  | 22262  | ARS402.5 |
| chr4 | 46181  | 46237  | ARS404   |
| chr4 | 85945  | 86177  | ARS405   |
| chr4 | 100380 | 101355 | ARS405.5 |
| chr4 | 123617 | 123902 | ARS406   |
| chr4 | 137445 | 137808 | ARS407   |
| chr4 | 157744 | 158235 | ARS408   |
| chr4 | 212420 | 212669 | ARS409   |
| chr4 | 232140 | 232618 | ARS409.3 |
| chr4 | 235935 | 236184 | ARS409.5 |
| chr4 | 253789 | 254038 | ARS410   |
| chr4 | 316719 | 317111 | ARS412   |
| chr4 | 329564 | 329813 | ARS413   |
| chr4 | 350835 | 351804 | ARS413.5 |
| chr4 | 408070 | 408312 | ARS414   |
| chr4 | 435056 | 435388 | ARS415   |
| chr4 | 462430 | 462700 | ARS416   |
| chr4 | 483846 | 484091 | ARS417   |
| chr4 | 505336 | 505578 | ARS417.5 |
| chr4 | 555224 | 555461 | ARS418   |
| chr4 | 567490 | 567737 | ARS419   |
| chr4 | 629072 | 629669 | ARS420   |
| chr4 | 639859 | 640108 | ARS421   |
| chr4 | 702879 | 703125 | ARS422   |
| chr4 | 748384 | 748630 | ARS422.5 |
| chr4 | 753159 | 753391 | ARS423   |

|      |         |         |          |
|------|---------|---------|----------|
| chr4 | 806044  | 806270  | ARS425   |
| chr4 | 844597  | 845593  | ARS426.5 |
| chr4 | 903824  | 904655  | ARS427.5 |
| chr4 | 913780  | 914029  | ARS428   |
| chr4 | 921682  | 921930  | ARS429   |
| chr4 | 942983  | 943975  | ARS429.5 |
| chr4 | 1016624 | 1016922 | ARS430   |
| chr4 | 1033069 | 1034182 | ARS430.5 |
| chr4 | 1057828 | 1058076 | ARS431   |
| chr4 | 1109955 | 1110196 | ARS431.5 |
| chr4 | 1130672 | 1131155 | ARS431.7 |
| chr4 | 1159250 | 1159499 | ARS432   |
| chr4 | 1165998 | 1166221 | ARS432.5 |
| chr4 | 1240869 | 1241098 | ARS433   |
| chr4 | 1276212 | 1276440 | ARS434   |
| chr4 | 1302579 | 1302819 | ARS435   |
| chr4 | 1353494 | 1353667 | ARS437   |
| chr4 | 1385151 | 1385630 | ARS439.5 |
| chr4 | 1404277 | 1404512 | ARS440   |
| chr4 | 1447298 | 1448928 | ARS441   |
| chr4 | 1461849 | 1462161 | ARS442   |
| chr4 | 1486905 | 1487149 | ARS446   |
| chr4 | 1502624 | 1503221 | ARS447   |
| chr5 | 4097    | 4185    | ARS502   |
| chr5 | 6464    | 7230    | ARS503   |
| chr5 | 8786    | 10019   | ARS504   |
| chr5 | 11713   | 12194   | ARS504.2 |
| chr5 | 59282   | 59516   | ARS507   |
| chr5 | 93977   | 94218   | ARS508   |
| chr5 | 145539  | 145782  | ARS510   |
| chr5 | 173636  | 173874  | ARS511   |
| chr5 | 192493  | 192926  | ARS511.5 |
| chr5 | 212381  | 212630  | ARS512   |
| chr5 | 276127  | 276526  | ARS513.5 |
| chr5 | 278073  | 278355  | ARS513.7 |
| chr5 | 287504  | 287750  | ARS514   |
| chr5 | 301565  | 302061  | ARS514.5 |
| chr5 | 353504  | 353751  | ARS516   |
| chr5 | 406747  | 406949  | ARS517   |
| chr5 | 438929  | 439178  | ARS518   |
| chr5 | 442412  | 442731  | ARS519   |
| chr5 | 498417  | 499343  | ARS520   |
| chr5 | 520767  | 521025  | ARS521   |
| chr5 | 549560  | 549809  | ARS522   |
| chr5 | 569020  | 570085  | ARS523   |
| chr6 | 5435    | 6155    | ARS600.1 |
| chr6 | 12174   | 13028   | ARS600.2 |
| chr6 | 18682   | 19864   | ARS600.3 |
| chr6 | 19669   | 20826   | ARS600.4 |
| chr6 | 32472   | 32995   | ARS601   |
| chr6 | 32666   | 33247   | ARS602   |
| chr6 | 68690   | 68869   | ARS603   |

|      |         |         |          |
|------|---------|---------|----------|
| chr6 | 104456  | 104695  | ARS603.1 |
| chr6 | 118631  | 118952  | ARS603.5 |
| chr6 | 127745  | 128066  | ARS604   |
| chr6 | 135979  | 136080  | ARS605   |
| chr6 | 167606  | 168041  | ARS606   |
| chr6 | 199382  | 199493  | ARS607   |
| chr6 | 216344  | 216692  | ARS608   |
| chr6 | 253316  | 253800  | ARS608.5 |
| chr6 | 256263  | 256418  | ARS609   |
| chr6 | 269404  | 270022  | ARS610   |
| chr7 | 17629   | 18112   | ARS700.5 |
| chr7 | 64279   | 64528   | ARS702   |
| chr7 | 112080  | 112319  | ARS704   |
| chr7 | 117471  | 117955  | ARS706   |
| chr7 | 163180  | 163447  | ARS707   |
| chr7 | 187241  | 187651  | ARS709   |
| chr7 | 203917  | 204159  | ARS710   |
| chr7 | 231909  | 231984  | ARS711   |
| chr7 | 240972  | 241441  | ARS712   |
| chr7 | 285951  | 286246  | ARS714   |
| chr7 | 352695  | 352917  | ARS716   |
| chr7 | 388658  | 388892  | ARS717   |
| chr7 | 421093  | 421342  | ARS718   |
| chr7 | 484932  | 485160  | ARS719   |
| chr7 | 508729  | 508978  | ARS720   |
| chr7 | 568490  | 568738  | ARS721   |
| chr7 | 574622  | 574916  | ARS722   |
| chr7 | 607176  | 607619  | ARS724.5 |
| chr7 | 653611  | 654091  | ARS726   |
| chr7 | 659809  | 660054  | ARS727   |
| chr7 | 715273  | 715556  | ARS728   |
| chr7 | 777967  | 778216  | ARS729   |
| chr7 | 834492  | 834736  | ARS731   |
| chr7 | 888350  | 888599  | ARS731.5 |
| chr7 | 916675  | 917170  | ARS732   |
| chr7 | 977730  | 977979  | ARS733   |
| chr7 | 999448  | 999695  | ARS734   |
| chr7 | 1002182 | 1002571 | ARS735   |
| chr7 | 1063254 | 1063715 | ARS735.5 |
| chr7 | 1082959 | 1084336 | ARS131a  |
| chr8 | 5158    | 6168    | ARS131n  |
| chr8 | 7534    | 7782    | ARS802   |
| chr8 | 45589   | 46076   | ARS804   |
| chr8 | 64255   | 64489   | ARS805   |
| chr8 | 94759   | 95192   | ARS805.5 |
| chr8 | 111293  | 111766  | ARS805.7 |
| chr8 | 133347  | 133591  | ARS807   |
| chr8 | 140340  | 141265  | ARS808   |
| chr8 | 168531  | 168773  | ARS809   |
| chr8 | 213179  | 213861  | ARS810   |
| chr8 | 245719  | 245968  | ARS813   |
| chr8 | 296882  | 297475  | ARS815   |

|       |        |        |           |
|-------|--------|--------|-----------|
| chr8  | 359469 | 359928 | ARS816    |
| chr8  | 392148 | 392391 | ARS818    |
| chr8  | 406012 | 406508 | ARS818.5  |
| chr8  | 447619 | 447853 | ARS820    |
| chr8  | 474309 | 474793 | ARS821    |
| chr8  | 501751 | 501992 | ARS822    |
| chr8  | 520016 | 520630 | ARS823    |
| chr8  | 535403 | 535836 | ARS823.5  |
| chr8  | 555996 | 556327 | ARS824    |
| chr9  | 33335  | 33803  | ARS905    |
| chr9  | 73803  | 74220  | ARS907    |
| chr9  | 80058  | 80557  | ARS908    |
| chr9  | 105821 | 106048 | ARS909    |
| chr9  | 136094 | 136335 | ARS911    |
| chr9  | 162936 | 163302 | ARS911.5  |
| chr9  | 175034 | 175355 | ARS912    |
| chr9  | 214675 | 214826 | ARS913    |
| chr9  | 245694 | 245932 | ARS913.5  |
| chr9  | 247579 | 247800 | ARS914    |
| chr9  | 310583 | 311070 | ARS916    |
| chr9  | 341853 | 342096 | ARS919    |
| chr9  | 357156 | 357393 | ARS920    |
| chr9  | 411817 | 412053 | ARS922    |
| chr9  | 432496 | 432994 | ARS922.5  |
| chr10 | 64     | 577    | ARS1001   |
| chr10 | 7444   | 7943   | ARS1002   |
| chr10 | 16123  | 16762  | ARS1003   |
| chr10 | 23661  | 24158  | ARS1004   |
| chr10 | 67467  | 67949  | ARS1005   |
| chr10 | 99359  | 99796  | ARS1006   |
| chr10 | 113226 | 113828 | ARS1007   |
| chr10 | 161435 | 161860 | ARS1007.5 |
| chr10 | 203729 | 204614 | ARS1008   |
| chr10 | 228248 | 228740 | ARS1009   |
| chr10 | 248600 | 249300 | ARS1009.5 |
| chr10 | 298471 | 298952 | ARS1010   |
| chr10 | 336976 | 337225 | ARS1011   |
| chr10 | 374575 | 374818 | ARS1012   |
| chr10 | 375401 | 375923 | ARS1013   |
| chr10 | 416888 | 417134 | ARS1014   |
| chr10 | 442248 | 442658 | ARS1015   |
| chr10 | 454276 | 455248 | ARS1016   |
| chr10 | 459029 | 459588 | ARS1017   |
| chr10 | 501595 | 502525 | ARS1017.5 |
| chr10 | 540239 | 540474 | ARS1018   |
| chr10 | 609000 | 609750 | ARS1018.5 |
| chr10 | 612542 | 612975 | ARS1019   |
| chr10 | 654069 | 654309 | ARS1020   |
| chr10 | 683328 | 683817 | ARS1021   |
| chr10 | 711590 | 711837 | ARS1022   |
| chr10 | 729677 | 730208 | ARS1023   |
| chr10 | 736728 | 736970 | ARS1024   |

|       |         |         |           |
|-------|---------|---------|-----------|
| chr10 | 744102  | 744703  | ARS1025   |
| chr11 | 42110   | 42563   | ARS1102.5 |
| chr11 | 55670   | 55917   | ARS1103   |
| chr11 | 98329   | 98568   | ARS1104.5 |
| chr11 | 145433  | 145893  | ARS1105.5 |
| chr11 | 152934  | 153173  | ARS1106   |
| chr11 | 196038  | 196284  | ARS1106.3 |
| chr11 | 199886  | 200537  | ARS1106.5 |
| chr11 | 213080  | 213385  | ARS1106.7 |
| chr11 | 257390  | 257839  | ARS1107   |
| chr11 | 302152  | 302524  | ARS1107.5 |
| chr11 | 329322  | 329571  | ARS1109   |
| chr11 | 388607  | 388902  | ARS1112   |
| chr11 | 416822  | 417055  | ARS1113   |
| chr11 | 444561  | 445028  | ARS1113.5 |
| chr11 | 447657  | 447892  | ARS1114   |
| chr11 | 454453  | 459197  | ARS1114.5 |
| chr11 | 516653  | 516902  | ARS1116   |
| chr11 | 530070  | 530560  | ARS1117   |
| chr11 | 581468  | 581706  | ARS1118   |
| chr11 | 611874  | 612107  | ARS1120   |
| chr11 | 642355  | 642602  | ARS1123   |
| chr12 | 51860   | 52210   | ARS1203   |
| chr12 | 76711   | 77163   | ARS1205   |
| chr12 | 91417   | 91659   | ARS1206   |
| chr12 | 93166   | 93659   | ARS1206.5 |
| chr12 | 150914  | 151421  | ARS1208   |
| chr12 | 156646  | 156883  | ARS1209   |
| chr12 | 222410  | 222792  | ARS1210   |
| chr12 | 231179  | 231422  | ARS1211   |
| chr12 | 243527  | 243960  | ARS1211.5 |
| chr12 | 289220  | 289469  | ARS1212   |
| chr12 | 343577  | 344033  | ARS1212.5 |
| chr12 | 373156  | 373400  | ARS1213   |
| chr12 | 412668  | 412897  | ARS1215   |
| chr12 | 450485  | 450726  | ARS1216   |
| chr12 | 458826  | 459141  | ARS1216.5 |
| chr12 | 512868  | 513117  | ARS1217   |
| chr12 | 602938  | 603155  | ARS1218   |
| chr12 | 622672  | 623123  | ARS1219   |
| chr12 | 644937  | 645426  | ARS1219.7 |
| chr12 | 659823  | 660072  | ARS1220   |
| chr12 | 687249  | 687738  | ARS1220.5 |
| chr12 | 730275  | 730832  | ARS1222   |
| chr12 | 744942  | 745179  | ARS1223   |
| chr12 | 794020  | 794269  | ARS1226   |
| chr12 | 821907  | 822336  | ARS1227   |
| chr12 | 888569  | 888810  | ARS1227.5 |
| chr12 | 928051  | 928540  | ARS1229   |
| chr12 | 947908  | 948358  | ARS1231   |
| chr12 | 1007180 | 1007470 | ARS1232   |
| chr12 | 1013789 | 1014017 | ARS1233   |

|       |         |         |           |
|-------|---------|---------|-----------|
| chr12 | 1023967 | 1024207 | ARS1234   |
| chr12 | 1059486 | 1059919 | ARS1235   |
| chr13 | 31687   | 31935   | ARS1303   |
| chr13 | 39922   | 40355   | ARS1304   |
| chr13 | 49645   | 50141   | ARS1304.5 |
| chr13 | 73874   | 74373   | ARS1304.7 |
| chr13 | 94216   | 94463   | ARS1305   |
| chr13 | 137299  | 137548  | ARS1307   |
| chr13 | 158846  | 159279  | ARS1307.5 |
| chr13 | 183793  | 184037  | ARS1308   |
| chr13 | 263062  | 263296  | ARS1309   |
| chr13 | 286782  | 287067  | ARS1310   |
| chr13 | 370976  | 371221  | ARS1312   |
| chr13 | 432851  | 433347  | ARS1315   |
| chr13 | 468177  | 468468  | ARS1316   |
| chr13 | 503346  | 504087  | ARS1319   |
| chr13 | 535595  | 535843  | ARS1320   |
| chr13 | 554392  | 554750  | ARS1322   |
| chr13 | 611273  | 611488  | ARS1323   |
| chr13 | 634479  | 634714  | ARS1324   |
| chr13 | 649307  | 649551  | ARS1325   |
| chr13 | 688766  | 689221  | ARS1326   |
| chr13 | 758222  | 758470  | ARS1327   |
| chr13 | 772629  | 772878  | ARS1328   |
| chr13 | 805116  | 805338  | ARS1329   |
| chr13 | 815341  | 815567  | ARS1330   |
| chr13 | 865288  | 865683  | ARS1331.5 |
| chr13 | 878619  | 879115  | ARS1331.7 |
| chr13 | 897804  | 898040  | ARS1332   |
| chr14 | 28467   | 28699   | ARS1405   |
| chr14 | 61597   | 61894   | ARS1406   |
| chr14 | 89528   | 89802   | ARS1407   |
| chr14 | 126488  | 126981  | ARS1410   |
| chr14 | 169566  | 169804  | ARS1411   |
| chr14 | 196055  | 196291  | ARS1412   |
| chr14 | 250259  | 250506  | ARS1413   |
| chr14 | 279875  | 280108  | ARS1414   |
| chr14 | 321917  | 322210  | ARS1415   |
| chr14 | 352509  | 352996  | ARS1311.7 |
| chr14 | 412263  | 412493  | ARS1417   |
| chr14 | 449343  | 449588  | ARS1419   |
| chr14 | 498987  | 499232  | ARS1420   |
| chr14 | 545966  | 546201  | ARS1421   |
| chr14 | 561106  | 561384  | ARS1422   |
| chr14 | 609458  | 609706  | ARS1424   |
| chr14 | 635660  | 635901  | ARS1426   |
| chr14 | 691482  | 691727  | ARS1427   |
| chr14 | 713642  | 714136  | ARS1428   |
| chr14 | 738550  | 738982  | ARS1428.5 |
| chr14 | 764001  | 764500  | ARS1429   |
| chr15 | 35667   | 35903   | ARS1506.5 |
| chr15 | 72636   | 72872   | ARS1507   |

|       |         |         |           |
|-------|---------|---------|-----------|
| chr15 | 85195   | 85444   | ARS1508   |
| chr15 | 113843  | 114084  | ARS1509   |
| chr15 | 128922  | 130182  | ARS1509.3 |
| chr15 | 154972  | 155462  | ARS1509.5 |
| chr15 | 166974  | 167220  | ARS1510   |
| chr15 | 227481  | 228117  | ARS1510.5 |
| chr15 | 277529  | 277778  | ARS1511   |
| chr15 | 308969  | 309462  | ARS1512   |
| chr15 | 337279  | 337528  | ARS1513   |
| chr15 | 436732  | 436966  | ARS1513.5 |
| chr15 | 489645  | 490129  | ARS1514   |
| chr15 | 497144  | 497603  | ARS1515.5 |
| chr15 | 520541  | 521040  | ARS1515.7 |
| chr15 | 566409  | 566643  | ARS1516   |
| chr15 | 600885  | 600960  | ARS1517   |
| chr15 | 656632  | 656876  | ARS1519   |
| chr15 | 681112  | 681611  | ARS1520   |
| chr15 | 729739  | 729969  | ARS1521   |
| chr15 | 766617  | 766862  | ARS1523   |
| chr15 | 783344  | 783563  | ARS1524   |
| chr15 | 854735  | 855228  | ARS1525   |
| chr15 | 874190  | 874434  | ARS1526   |
| chr15 | 908288  | 908537  | ARS1528   |
| chr15 | 981454  | 981690  | ARS1529   |
| chr15 | 1053490 | 1053901 | ARS1529.5 |
| chr16 | 6778    | 8439    | ARS1601   |
| chr16 | 12290   | 13227   | ARS1602   |
| chr16 | 42976   | 43212   | ARS1604   |
| chr16 | 73038   | 73283   | ARS1605   |
| chr16 | 116505  | 116765  | ARS1607   |
| chr16 | 210467  | 211723  | ARS1609   |
| chr16 | 289483  | 289704  | ARS1614   |
| chr16 | 331678  | 332074  | ARS1617   |
| chr16 | 384536  | 384784  | ARS1618   |
| chr16 | 414032  | 416072  | ARS1618.5 |
| chr16 | 418132  | 418359  | ARS1619   |
| chr16 | 456557  | 456805  | ARS1620.5 |
| chr16 | 511619  | 511940  | ARS1621   |
| chr16 | 563822  | 564061  | ARS1622   |
| chr16 | 565046  | 565289  | ARS1622.5 |
| chr16 | 584037  | 584486  | ARS1622.7 |
| chr16 | 633868  | 634117  | ARS1623   |
| chr16 | 684383  | 684632  | ARS1624   |
| chr16 | 695432  | 695681  | ARS1625   |
| chr16 | 749094  | 749341  | ARS1626   |
| chr16 | 776921  | 777152  | ARS1626.5 |
| chr16 | 819153  | 819393  | ARS1627   |
| chr16 | 842646  | 842894  | ARS1628   |
| chr16 | 880854  | 881102  | ARS1630   |
| chr16 | 932976  | 933223  | ARS1631   |
| chr4  | 8605    | 8615    |           |
| chr4  | 476665  | 476675  |           |



|       |         |         |  |
|-------|---------|---------|--|
| chr4  | 720675  | 720685  |  |
| chr4  | 898705  | 898715  |  |
| chr4  | 899245  | 899255  |  |
| chr4  | 1379755 | 1379765 |  |
| chr4  | 1525275 | 1525285 |  |
| chr5  | 18475   | 18485   |  |
| chr5  | 256185  | 256195  |  |
| chr5  | 316575  | 316585  |  |
| chr7  | 32925   | 32935   |  |
| chr7  | 1073775 | 1073785 |  |
| chr8  | 381035  | 381045  |  |
| chr8  | 550825  | 550835  |  |
| chr9  | 7835    | 7845    |  |
| chr9  | 16735   | 16745   |  |
| chr9  | 30665   | 30675   |  |
| chr9  | 190285  | 190295  |  |
| chr9  | 438825  | 438835  |  |
| chr10 | 643975  | 643985  |  |
| chr11 | 236045  | 236055  |  |
| chr11 | 462665  | 462675  |  |
| chr11 | 665465  | 665475  |  |
| chr12 | 11375   | 11385   |  |
| chr12 | 31875   | 31885   |  |
| chr12 | 139795  | 139805  |  |
| chr12 | 468045  | 468055  |  |
| chr12 | 786445  | 786455  |  |
| chr13 | 341665  | 341675  |  |
| chr15 | 11085   | 11095   |  |
| chr15 | 19115   | 19125   |  |
| chr15 | 348345  | 348355  |  |
| chr15 | 463995  | 464005  |  |
| chr15 | 617315  | 617325  |  |
| chr15 | 899395  | 899405  |  |
| chr15 | 998295  | 998305  |  |
| chr15 | 1083715 | 1083725 |  |
| chr16 | 90435   | 90445   |  |
| chr16 | 162505  | 162515  |  |
| chr16 | 190565  | 190575  |  |
| chr16 | 261525  | 261535  |  |
| chr16 | 298495  | 298505  |  |
| chr16 | 317525  | 317535  |  |
| chr16 | 427925  | 427935  |  |
| chr16 | 499545  | 499555  |  |
| chr16 | 553355  | 553365  |  |
| chr16 | 864235  | 864245  |  |
| chr16 | 942165  | 942175  |  |
| chr5  | 53      | 218     |  |
| chr7  | 694     | 859     |  |
| chr8  | 205     | 370     |  |
| chr9  | 202     | 367     |  |
| chr11 | 686     | 851     |  |
| chr12 | 204     | 369     |  |

|       |         |         |  |
|-------|---------|---------|--|
| chr13 | 202     | 367     |  |
| chr14 | 161     | 326     |  |
| chr15 | 675     | 840     |  |
| chr16 | 70      | 235     |  |
| chr1  | 229445  | 229560  |  |
| chr2  | 812322  | 812437  |  |
| chr4  | 1531787 | 1531902 |  |
| chr5  | 576615  | 576730  |  |
| chr7  | 1090690 | 1090805 |  |
| chr8  | 562318  | 562433  |  |
| chr9  | 439076  | 439191  |  |
| chr11 | 665684  | 665799  |  |
| chr12 | 1077989 | 1078104 |  |
| chr13 | 923600  | 923715  |  |
| chr14 | 783509  | 783624  |  |
| chr15 | 1090965 | 1091080 |  |
| chr16 | 947789  | 947904  |  |

This dataset contains:

- all confirmed origins
- likely origins, that have not yet been confirmed, but were found by two independent ChIP studies
- telomeric origins that have not yet been confirmed, but are predicted from sequence conservation.

List of telomeric origins:

| Chromosome | End | Element | ACS                      | Distance from end (bp) |
|------------|-----|---------|--------------------------|------------------------|
| 1          | L   | X       | 29237..29247             | 699                    |
| 3          | L   | X       | 38940..38950             | 696                    |
| 4          | L   | X       | 29134..29144             | 712                    |
| 7          | L   | X       | 29257..29267             | 709                    |
| 11         | L   | X       | 29230..29240             | 701                    |
| 15         | L   | X       | 39191..39201             | 690                    |
| 1          | R   | X       | 29233..29243             | 663                    |
| 2          | R   | X       | 29232..29242             | 714                    |
| 3          | R   | X       | 29200..29210             | 696                    |
| 6          | R   | X       | 29609..29619             | 342                    |
| 9          | R   | X       | 29217..29227             | 709                    |
| 10         | R   | X       | 29188..29198             | 723                    |
| 11         | R   | X       | 29125..29135             | 661                    |
| 13         | R   | X       | 29146..29156             | 730                    |
| 14         | R   | X       | 28982..28992             | 719                    |
| 2          | L   | X-Y'    | 29911..29921             | 84                     |
| 5          | L   | X-Y'    | 29927..29937             | 68                     |
| 6          | L   | X-Y'    | not sequenced to the end | ***                    |
|            | L   | X-Y'    | 29746..29756             | 220                    |
| 9          | L   | X-Y'    | 29704..29714             | 217                    |
| 10         | L   | X-Y'    | 29721..29731             | 215                    |
| 13         | L   | X-Y'    | 29729..29739             | 217                    |
| 14         | L   | X-Y'    | 29819..29829             | 176                    |
| 16         | L   | X-Y'    | 29910..29920             | 85                     |
| 4          | R   | X-Y'    | 29968..29978             | 27                     |
| 5          | R   | X-Y'    | 29841..29851             | 154                    |
| 7          | R   | X-Y'    | 29841..29851             | 154                    |
| 8          | R   | X-Y'    | 39595..39605             | 221                    |
| 15         | R   | X-Y'    | 29761..29771             | 220                    |
| 16         | R   | X-Y'    | 29824..29834             | 171                    |
| 12         | L   | X-Y'-Y' | 29707..29717             | 219                    |
| 12         | R   | X-Y'-Y' | 29911..29921             | 84                     |

\*\*\*at Chromosome 6 left end the sequence stops some distance (several kb) short of the end; however, this end does have a Y' element. So, the origin should be < ~220 bp from the end.
